# Supplementary material for: An unprecedented C80 cage that violates the isolated pentagon rule
Source: Royal Society of Chemistry journal article supplement (doi:10.1039/d2qi00410k), 2022-01-01
Supplement: d2qi00410k5.pdf [file d2qi00410k5.pdf]

## Supporting Information for An unprecedented C<sub>80</sub> cage that violates the isolated pentagon rule

Pengwei Yu,<sup>†a</sup> Mengyang Li,<sup>†b</sup> Wangqiang Shen,<sup>a</sup> Shuaifeng Hu,<sup>a</sup> Pengyuan Yu,<sup>a</sup>  
Xinyue Tian,<sup>a</sup> Xiang Zhao,<sup>\*b</sup> Lipiao Bao<sup>\*a</sup> and Xing Lu<sup>\*a</sup>

<sup>a</sup>State Key Laboratory of Materials Processing and Die & Mould Technology, School of Materials Science and Engineering, Huazhong University of Science and Technology, 1037 Luoyu Road, Wuhan, 430074 China. E-mail: [baol@hust.edu.cn](mailto:baol@hust.edu.cn); [lux@hust.edu.cn](mailto:lux@hust.edu.cn)

<sup>b</sup>Institute of Molecular Science & Applied Chemistry, School of Chemistry, Xi'an Jiaotong University, Xi'an 710049, China. E-mail: [xzhao@mail.xjtu.edu.cn](mailto:xzhao@mail.xjtu.edu.cn)

### Table of Contents

|                                                                                                                                                                                                                                                                                   |           |
|-----------------------------------------------------------------------------------------------------------------------------------------------------------------------------------------------------------------------------------------------------------------------------------|-----------|
| <b>Isolation of Lu<sub>2</sub>O@C<sub>1</sub>(31876)-C<sub>80</sub> and Lu<sub>2</sub>O@C<sub>2v</sub>(5)-C<sub>80</sub>.</b>                                                                                                                                                     | <b>S2</b> |
| <b>Frontier molecular orbital analyses.</b>                                                                                                                                                                                                                                       | <b>S7</b> |
| <b>Figure S1.</b> Isolation of Lu <sub>2</sub> O@C <sub>1</sub> (31876)-C <sub>80</sub> and Lu <sub>2</sub> O@C <sub>2v</sub> (5)-C <sub>80</sub> .                                                                                                                               | <b>S3</b> |
| <b>Figure S2.</b> HPLC chromatograms and mass spectra of Lu <sub>2</sub> O@C <sub>1</sub> (31876)-C <sub>80</sub> and Lu <sub>2</sub> O@C <sub>2v</sub> (5)-C <sub>80</sub> .                                                                                                     | <b>S3</b> |
| <b>Table S1.</b> Crystallographic data of Lu <sub>2</sub> O@C <sub>1</sub> (31876)-C <sub>80</sub> ·Ni <sup>II</sup> (OEP)·2(C <sub>6</sub> H <sub>6</sub> ) and Lu <sub>2</sub> O@C <sub>2v</sub> (5)-C <sub>80</sub> ·Ni <sup>II</sup> (OEP)·2(C <sub>6</sub> H <sub>6</sub> ). | <b>S4</b> |
| <b>Figure S3.</b> Positions of the disordered lutetium atoms in Lu <sub>2</sub> O@C <sub>1</sub> (31876)-C <sub>80</sub> and Lu <sub>2</sub> O@C <sub>2v</sub> (5)-C <sub>80</sub> relative to a cage orientation.                                                                | <b>S5</b> |
| <b>Table S2.</b> Fractional occupancies of the Lu positions in Lu <sub>2</sub> O@C <sub>1</sub> (31876)-C <sub>80</sub> and Lu <sub>2</sub> O@C <sub>2v</sub> (5)-C <sub>80</sub> .                                                                                               | <b>S5</b> |
| <b>Figure S4.</b> Structures of the major Lu <sub>2</sub> O sites with respect to the nearest carbon atoms in the C <sub>1</sub> (31876)-C <sub>80</sub> and C <sub>2v</sub> (5)-C <sub>80</sub> cages.                                                                           | <b>S6</b> |
| <b>Table S3.</b> Details of the oxide clusters at the major sites for Lu <sub>2</sub> O@C <sub>1</sub> (31876)-C <sub>80</sub> , Lu <sub>2</sub> O@C <sub>2v</sub> (5)-C <sub>80</sub> and Sc <sub>2</sub> O@C <sub>2v</sub> (5)-C <sub>80</sub> .                                | <b>S6</b> |
| <b>Table S4.</b> Relative energy and the energy gaps of Lu <sub>2</sub> O@C <sub>80</sub> isomers.                                                                                                                                                                                | <b>S7</b> |
| <b>Figure S5.</b> Frontier molecular orbitals of C <sub>1</sub> (31876)-C <sub>80</sub> , C <sub>2v</sub> (5)-C <sub>80</sub> ,                                                                                                                                                   |           |

|                                                                                                                                                             |     |
|-------------------------------------------------------------------------------------------------------------------------------------------------------------|-----|
| Lu <sub>2</sub> O@C <sub>1</sub> (31876)-C <sub>80</sub> , and Lu <sub>2</sub> O@C <sub>2v</sub> (5)-C <sub>80</sub> .                                      | S7  |
| <b>Figure S6.</b> Transformation between C <sub>s</sub> (6)-C <sub>82</sub> , C <sub>2v</sub> (9)-C <sub>82</sub> and C <sub>3v</sub> (8)-C <sub>82</sub> . | S8  |
| <b>Figure S7.</b> Transformation from C <sub>s</sub> (6)-C <sub>82</sub> to C <sub>1</sub> (31876)-C <sub>80</sub> .                                        | S8  |
| <b>Figure S8.</b> Transformation between C <sub>1</sub> (31876)-C <sub>80</sub> and C <sub>2v</sub> (5)-C <sub>80</sub> .                                   | S8  |
| <b>Figure S9.</b> Transformation from C <sub>1</sub> (31876)-C <sub>80</sub> to C <sub>2v</sub> (3)-C <sub>78</sub> .                                       | S8  |
| <b>Figure S10.</b> Transformation between C <sub>2v</sub> (3)-C <sub>78</sub> and D <sub>3h</sub> (5)-C <sub>78</sub> .                                     | S9  |
| <b>Table S5.</b> Cartesian coordinates of the four low-energy Lu <sub>2</sub> O@C <sub>80</sub> isomers.                                                    | S9  |
| <b>References.</b>                                                                                                                                          | S15 |

**Isolation of Lu<sub>2</sub>O@C<sub>1</sub>(31876)-C<sub>80</sub> and Lu<sub>2</sub>O@C<sub>2v</sub>(5)-C<sub>80</sub>.** Separation and purification of Lu<sub>2</sub>O@C<sub>2v</sub>(5)-C<sub>80</sub> and Lu<sub>2</sub>O@C<sub>1</sub>(31876)-C<sub>80</sub> were achieved by a multiple-stage HPLC process using toluene as the eluent. The first stage was performed on a Buckyprep column (20 mm × 250 mm, Cosmosil Nacalai Tesque), and one fraction, which is named as Fr7, was collected (Figure S1a). Then, Fr7 was injected into a Buckyprep-M column (20 mm × 250 mm, Cosmosil Nacalai Tesque) for the second stage separation, and a fraction named Fr7-3 was obtained (Figure S1b). After that, Fr7-3 was injected into a 5PBB column (20 mm × 250 mm, Cosmosil Nacalai Tesque), and a fraction named Fr7-3-2 was collected (Figure S1c). Fr7-3-2 was then injected into a Buckyprep column (20 mm × 250 mm, Cosmosil Nacalai Tesque) for recycling separation, and Lu<sub>2</sub>O@C<sub>2v</sub>(5)-C<sub>80</sub> (Fr7-3-2-3) and Lu<sub>2</sub>O@C<sub>1</sub>(31876)-C<sub>80</sub> (Fr7-3-2-4) were finally obtained (Figure S1d). Their high purity was demonstrated by the analytical HPLC chromatograms and the mass spectra (Figure S2).

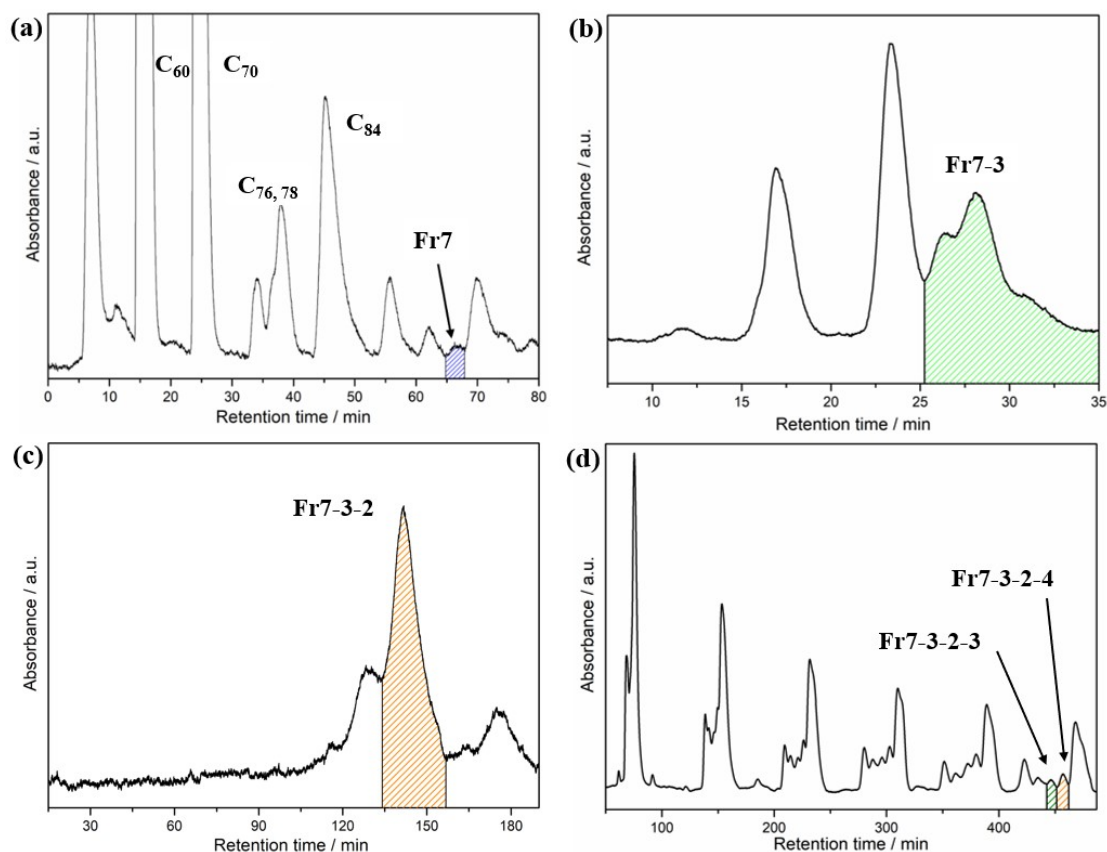

**Figure S1.** (a) Isolation scheme of fullerene extract on a Buckyprep column. Conditions: 20 mL inject volume; 10 mL/min toluene flow; (b) Isolation scheme of Fr7 on a Buckyprep-M column. Conditions: 15 mL inject volume; 10 mL/min toluene flow; (c) Isolation scheme of Fr7-3 on a 5PBB column. Conditions: 10 mL injection volume; 10 mL/min chlorobenzene flow. (d) Recycling HPLC chromatogram of Fr7-3-2 on a Buckyprep column. Conditions: 5 mL injection volume; 10 mL/min toluene flow. All the detection wavelengths are 330 nm.

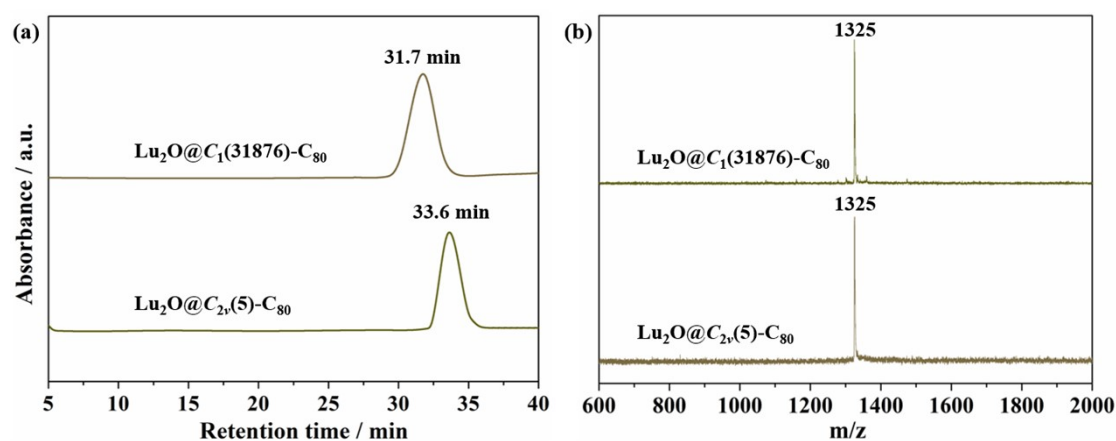

**Figure S2.** (a) HPLC chromatograms and (b) LDI-TOF mass spectra of Lu<sub>2</sub>O@C<sub>1</sub>(31876)-C<sub>80</sub> and Lu<sub>2</sub>O@C<sub>2<sub>v</sub></sub>(5)-C<sub>80</sub>. HPLC conditions: Buckyprep column ( $\phi = 4.6 \times 250$  mm); 20  $\mu$ L injection volume; 1 mL min<sup>-1</sup> toluene flow; 330 nm detection wavelength; 40 °C.

**Table S1.** Crystallographic data of  $\text{Lu}_2\text{O}@C_1(31876)\text{-C}_{80}\cdot\text{Ni}^{\text{II}}(\text{OEP})\cdot 2(\text{C}_6\text{H}_6)$  and  $\text{Lu}_2\text{O}@C_{2v}(5)\text{-C}_{80}\cdot\text{Ni}^{\text{II}}(\text{OEP})\cdot 2(\text{C}_6\text{H}_6)$ .

|                                   | $\text{Lu}_2\text{O}@C_1(31876)\text{-C}_{80}\cdot\text{Ni}^{\text{II}}(\text{OEP})\cdot 2(\text{C}_6\text{H}_6)$ | $\text{Lu}_2\text{O}@C_{2v}(5)\text{-C}_{80}\cdot\text{Ni}^{\text{II}}(\text{OEP})\cdot 2(\text{C}_6\text{H}_6)$ |
|-----------------------------------|-------------------------------------------------------------------------------------------------------------------|------------------------------------------------------------------------------------------------------------------|
| <i>T</i> , K                      | 100(2)                                                                                                            | 100(2)                                                                                                           |
| $\lambda$ , Å                     | 0.7336                                                                                                            | 0.7336                                                                                                           |
| color / habit                     | black / block                                                                                                     | black / block                                                                                                    |
| crystal size, mm                  | 0.08×0.06×0.04                                                                                                    | 0.14×0.10×0.10                                                                                                   |
| empirical formula                 | $\text{C}_{128}\text{H}_{56}\text{Lu}_2\text{N}_4\text{NiO}$                                                      | $\text{C}_{128}\text{H}_{56}\text{Lu}_2\text{N}_4\text{NiO}$                                                     |
| fw                                | 2074.42                                                                                                           | 2074.42                                                                                                          |
| crystal system                    | monoclinic                                                                                                        | monoclinic                                                                                                       |
| space group                       | <i>C2/m</i>                                                                                                       | <i>C2/m</i>                                                                                                      |
| <i>a</i> , Å                      | 25.2864(13)                                                                                                       | 25.2000(3)                                                                                                       |
| <i>b</i> , Å                      | 15.1800(8)                                                                                                        | 15.1832(18)                                                                                                      |
| <i>c</i> , Å                      | 19.7371(10)                                                                                                       | 19.6920(3)                                                                                                       |
| $\alpha$ , deg                    | 90                                                                                                                | 90                                                                                                               |
| $\beta$ , deg                     | 95.204(2)                                                                                                         | 94.432(5)                                                                                                        |
| $\gamma$ , deg                    | 90                                                                                                                | 90                                                                                                               |
| <i>V</i> , Å <sup>3</sup>         | 7544.8(7)                                                                                                         | 7511.7(16)                                                                                                       |
| <i>Z</i>                          | 4                                                                                                                 | 4                                                                                                                |
| $\rho$ , g/cm <sup>3</sup>        | 1.826                                                                                                             | 1.834                                                                                                            |
| $\mu$ , mm <sup>-1</sup>          | 2.915                                                                                                             | 3.163                                                                                                            |
| <i>R</i> <sub>1</sub> (all data)  | 0.1316                                                                                                            | 0.1020                                                                                                           |
| <i>wR</i> <sub>2</sub> (all data) | 0.2640                                                                                                            | 0.2526                                                                                                           |

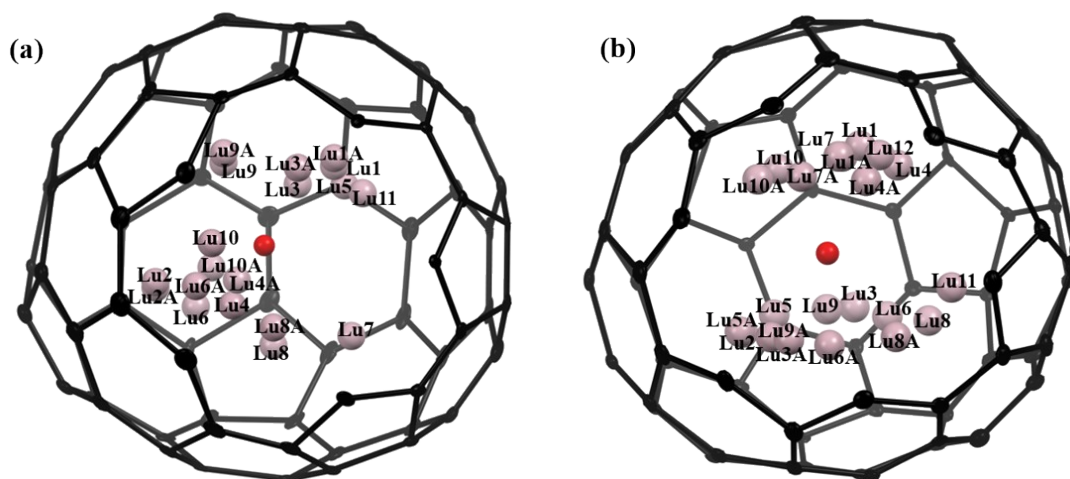

**Figure S3.** Positions of the disordered lutetium atoms in (a)  $\text{Lu}_2\text{O}@C_1(31876)\text{-C}_{80}$  and (b)  $\text{Lu}_2\text{O}@C_{2v}(5)\text{-C}_{80}$  relative to a cage orientation. Those Lu atoms labeled with an “A” are generated by crystallographic operation. Some cage carbon atoms are omitted for clarity.

**Table S2.** Fractional occupancies of the Lu positions in  $\text{Lu}_2\text{O}@C_1(31876)\text{-C}_{80}$  and  $\text{Lu}_2\text{O}@C_{2v}(5)\text{-C}_{80}$ .

| EMFs                                           | Fractional occupancy of the Lu positions |          |          |            |          |          |
|------------------------------------------------|------------------------------------------|----------|----------|------------|----------|----------|
| $\text{Lu}_2\text{O}@C_1(31876)\text{-C}_{80}$ | Lu1/Lu1A                                 | Lu2/Lu2A | Lu3/Lu3A | Lu4/Lu4A   | Lu5/Lu5A | Lu6/Lu6A |
|                                                | 0.24                                     | 0.24     | 0.11     | 0.10       | 0.09     | 0.06     |
|                                                | Lu7                                      | Lu8/Lu8A | Lu9/Lu9A | Lu10/Lu10A | Lu11     |          |
|                                                | 0.06                                     | 0.04     | 0.04     | 0.02       | 0.02     |          |
| $\text{Lu}_2\text{O}@C_{2v}(5)\text{-C}_{80}$  | Lu1/Lu1A                                 | Lu2      | Lu3/Lu3A | Lu4/Lu4A   | Lu5/Lu5A | Lu6/Lu6A |
|                                                | 0.21                                     | 0.25     | 0.16     | 0.10       | 0.06     | 0.06     |
|                                                | Lu7/Lu7A                                 | Lu8/Lu8A | Lu9/Lu9A | Lu10/Lu10A | Lu11     | Lu12     |
|                                                | 0.06                                     | 0.05     | 0.05     | 0.05       | 0.04     | 0.03     |

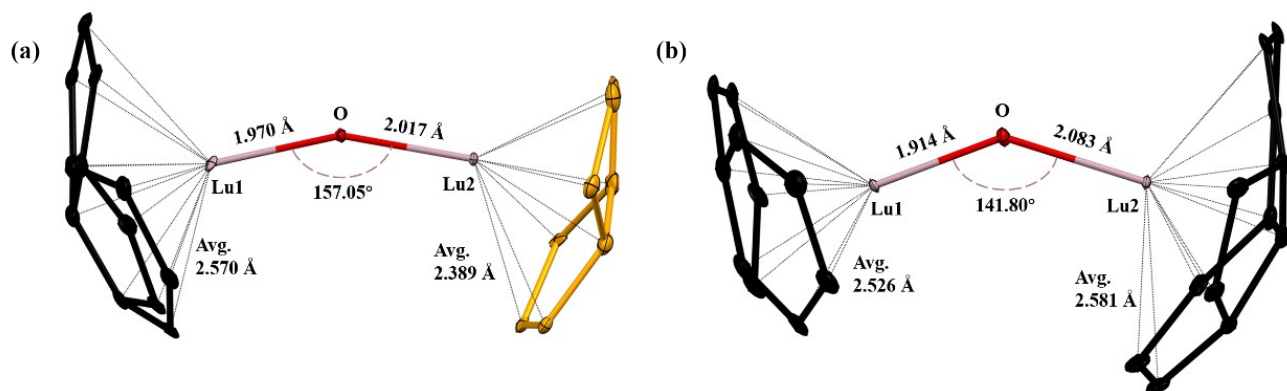

**Figure S4.** Structures of the major  $\text{Lu}_2\text{O}$  sites with respect to the nearest carbon atoms in the (a)  $C_1(31876)\text{-C}_{80}$  and (b)  $C_{2v}(5)\text{-C}_{80}$  cages. C, O, and Lu atoms are shown in black, red, and purple, respectively.

**Table S3.** Details of the oxide clusters at the major sites for  $\text{Lu}_2\text{O}@C_1(31876)\text{-C}_{80}$ ,  $\text{Lu}_2\text{O}@C_{2v}(5)\text{-C}_{80}$  and  $\text{Sc}_2\text{O}@C_{2v}(5)\text{-C}_{80}$ .

| $\text{Lu}_2\text{O}@C_1(31876)\text{-C}_{80}$ |                | $\text{Lu}_2\text{O}@C_{2v}(5)\text{-C}_{80}$ |                | $\text{Sc}_2\text{O}@C_{2v}(5)\text{-C}_{80}$ <sup>S1</sup> |                |
|------------------------------------------------|----------------|-----------------------------------------------|----------------|-------------------------------------------------------------|----------------|
| Lu1-cage                                       | 2.570 Å (avg.) | Lu1-cage                                      | 2.526 Å (avg.) | Sc1-cage                                                    | 2.519 Å (avg.) |
| Lu2-cage                                       | 2.389 Å (avg.) | Lu2-cage                                      | 2.581 Å (avg.) | Sc2-cage                                                    | 2.503 Å (avg.) |
| Lu1-O                                          | 1.970 Å        | Lu1-O                                         | 1.914 Å        | Sc1-O                                                       | 1.861 Å        |
| Lu2-O                                          | 2.017 Å        | Lu2-O                                         | 2.083 Å        | Sc2-O                                                       | 2.017 Å        |
| Lu1-O-Lu2                                      | 157.05°        | Lu1-O-Lu2                                     | 141.80°        | Sc1-O-Sc2                                                   | 160.79°        |

**Table S4.** Relative energy ( $\Delta E$  / kcal·mol<sup>-1</sup>) and the energy gaps (Gap / eV) between HOMO and LUMO of Lu<sub>2</sub>O@C<sub>80</sub> isomers on the PBE/6-31G(d)-SDD level.

| Isomer <sup>a</sup>                                        | APP <sup>b</sup> | Multiplicity   | $\Delta E$ | Gap         |
|------------------------------------------------------------|------------------|----------------|------------|-------------|
| Lu <sub>2</sub> O@I <sub>h</sub> (7)-C <sub>80</sub>       | 0                | Singlet        | 0.0        | 0.13        |
| Lu <sub>2</sub> O@D <sub>5h</sub> (6)-C <sub>80</sub>      | 0                | Singlet        | 3.4        | 0.20        |
| <b>Lu<sub>2</sub>O@C<sub>1</sub>(31876)-C<sub>80</sub></b> | <b>1</b>         | <b>Singlet</b> | <b>6.3</b> | <b>0.77</b> |
| <b>Lu<sub>2</sub>O@C<sub>2v</sub>(5)-C<sub>80</sub></b>    | <b>0</b>         | <b>Singlet</b> | <b>6.9</b> | <b>0.73</b> |
| Lu <sub>2</sub> O@C <sub>1</sub> (28324)-C <sub>80</sub>   | 1                | Singlet        | 15.5       | 0.86        |
| Lu <sub>2</sub> O@C <sub>2v</sub> (3)-C <sub>80</sub>      | 0                | Singlet        | 16.4       | 0.35        |
| Lu <sub>2</sub> O@C <sub>1</sub> (31891)-C <sub>80</sub>   | 1                | Singlet        | 19.1       | 0.17        |

<sup>a</sup>Isomer number according to the spiral algorithm of Fowler and Manolopoulos.<sup>S2</sup> The simplified number is used for the IPR isomers. <sup>b</sup>APP: number of adjacent pentagon pairs.

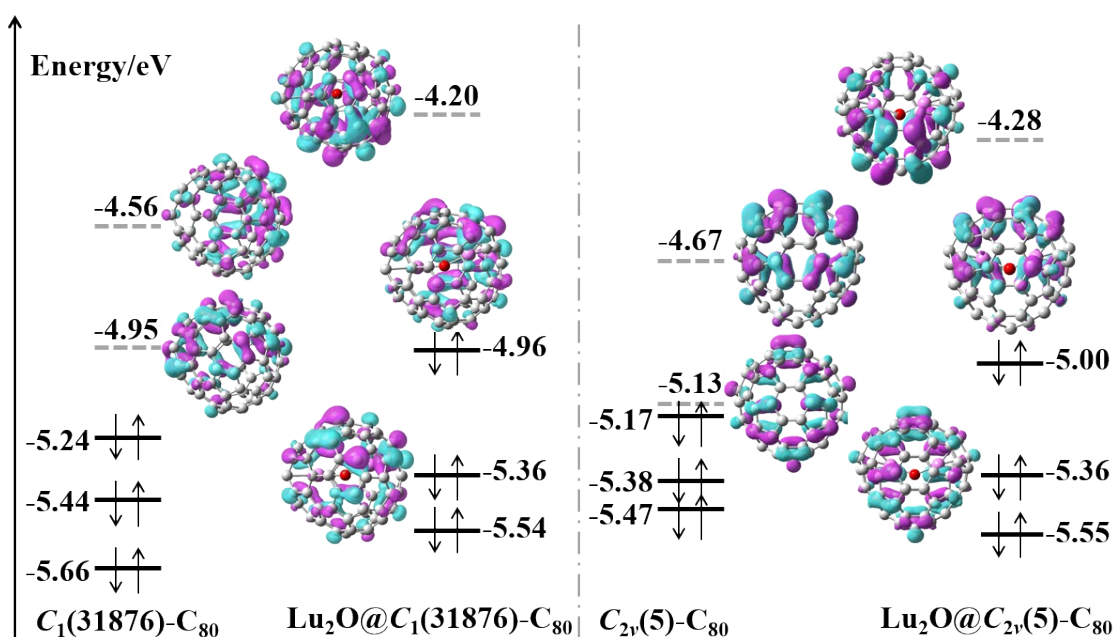

**Figure S5.** Energies of frontier molecular orbitals of C<sub>1</sub>(31876)-C<sub>80</sub>, C<sub>2v</sub>(5)-C<sub>80</sub>, Lu<sub>2</sub>O@C<sub>1</sub>(31876)-C<sub>80</sub>, and Lu<sub>2</sub>O@C<sub>2v</sub>(5)-C<sub>80</sub>, maps of LUMO and LUMO+1 of C<sub>1</sub>(31876)-C<sub>80</sub> and C<sub>2v</sub>(5)-C<sub>80</sub>, and LUMO, HOMO and HOMO-1 of Lu<sub>2</sub>O@C<sub>1</sub>(31876)-C<sub>80</sub> and Lu<sub>2</sub>O@C<sub>2v</sub>(5)-C<sub>80</sub> on the PBE/6-311G(d,p)-def2-TZVP//6-31G(d)-SDD.

**Frontier molecular orbital analyses.** Based on the frontier molecular orbital analyses, it can be clearly confirmed that the LUMO and LUMO+1 of C<sub>80</sub> clearly become the HOMO-1 and HOMO of Lu<sub>2</sub>O@C<sub>80</sub>, respectively, indicating the four-electron transfer

from  $\text{Lu}_2\text{O}$  to  $\text{C}_{80}$ , *i.e.*,  $(\text{Lu}_2\text{O})^{4+}@\text{C}_{80}^{4-}$ . Furthermore, the HOMO and LUMO orbitals of  $\text{Lu}_2\text{O}@\text{C}_1(31876)\text{-C}_{80}$  and  $\text{Lu}_2\text{O}@\text{C}_{2v}(5)\text{-C}_{80}$  are mainly located on the cage frameworks, and their the HOMO-LUMO gaps are 0.76 eV and 0.72 eV, respectively.

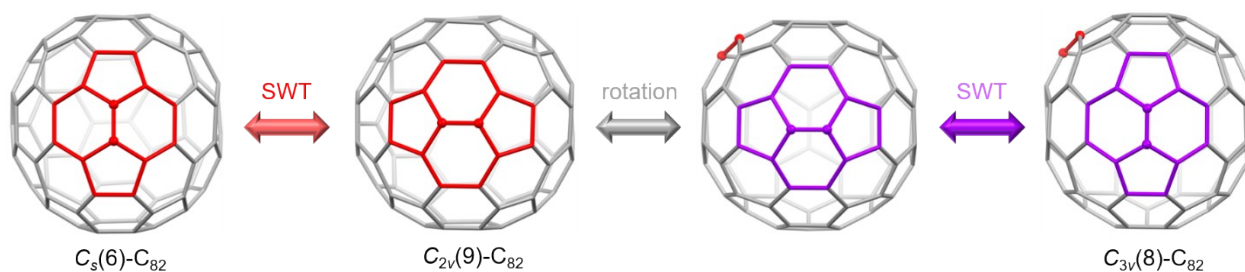

**Figure S6.** Transformation between  $C_s(6)\text{-C}_{82}$ ,  $C_{2v}(9)\text{-C}_{82}$  and  $C_{3v}(8)\text{-C}_{82}$ .

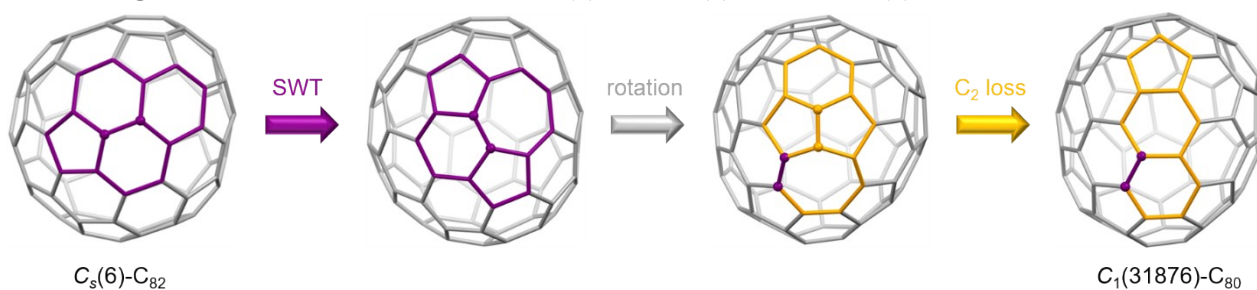

**Figure S7.** Transformation from  $C_s(6)\text{-C}_{82}$  to  $C_1(31876)\text{-C}_{80}$ .

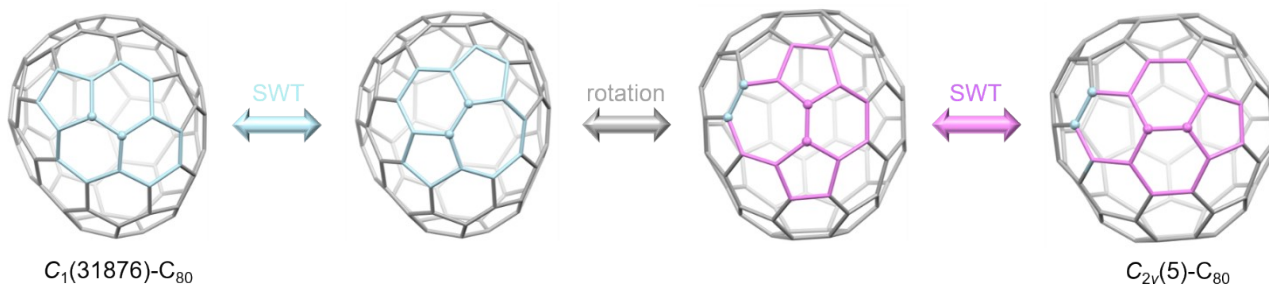

**Figure S8.** Transformation between  $C_1(31876)\text{-C}_{80}$  and  $C_{2v}(5)\text{-C}_{80}$ .

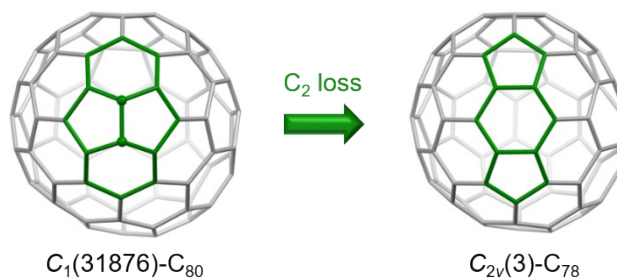

**Figure S9.** Transformation from  $C_1(31876)\text{-C}_{80}$  to  $C_{2v}(3)\text{-C}_{78}$ .



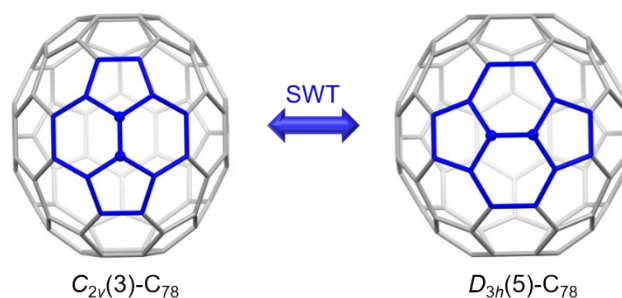

**Figure S10.** Transformation between  $C_{2v}(3)-C_{78}$  and  $D_{3h}(5)-C_{78}$ .

**Table S5.** Cartesian coordinates of the four low-energy  $\text{Lu}_2\text{O}@C_{80}$  isomers.

| $\text{Lu}_2\text{O}@I_h(7)-C_{80}$ |             |             |             | $\text{Lu}_2\text{O}@D_{5h}(6)-C_{80}$ |             |             |             |
|-------------------------------------|-------------|-------------|-------------|----------------------------------------|-------------|-------------|-------------|
| C                                   | -0.03901400 | -0.01862200 | 0.05269100  | C                                      | -0.04448500 | -0.03361000 | 0.11727000  |
| C                                   | 1.40502100  | -0.02732000 | 0.06776600  | C                                      | 1.40269300  | -0.02396000 | 0.11882800  |
| C                                   | 2.16884500  | 1.21580800  | 0.07166900  | C                                      | 2.14258200  | 1.20690600  | 0.08707400  |
| C                                   | 3.39931500  | 1.00570500  | -0.66291500 | C                                      | 3.41239000  | 1.16018900  | -0.57199500 |
| C                                   | 4.05020200  | 2.06183700  | -1.39902200 | C                                      | 3.94367100  | 2.32438500  | -1.25325400 |
| C                                   | 4.69657500  | 1.67831000  | -2.63372600 | C                                      | 4.64758700  | 1.90644800  | -2.45646100 |
| C                                   | 4.70036300  | 2.55549500  | -3.80457700 | C                                      | 4.59859000  | 2.68761600  | -3.65772500 |
| C                                   | 4.62280800  | 1.69080300  | -4.97381400 | C                                      | 4.68671900  | 1.95740100  | -4.88849100 |
| C                                   | 3.93249700  | 2.07323800  | -6.17678400 | C                                      | 4.02101200  | 2.42565100  | -6.09485500 |
| C                                   | 3.32741600  | 1.04383600  | -6.96451400 | C                                      | 3.51246700  | 1.29128200  | -6.84071000 |
| C                                   | 2.08623900  | 1.28077600  | -7.64895900 | C                                      | 2.26449700  | 1.36639200  | -7.53771000 |
| C                                   | 1.31922000  | 0.04129900  | -7.62544400 | C                                      | 1.52678100  | 0.13828900  | -7.64423800 |
| C                                   | -0.12460500 | 0.04885300  | -7.56905500 | C                                      | 0.08030100  | 0.12944100  | -7.68930500 |
| C                                   | -0.77452600 | -1.01895500 | -6.86118300 | C                                      | -0.41220400 | -1.00382500 | -6.95763800 |
| C                                   | -2.02309300 | -0.81863900 | -6.15248100 | C                                      | -1.60737900 | -0.91445000 | -6.17800400 |
| C                                   | -2.02550900 | -1.69678800 | -4.98293700 | C                                      | -1.66502100 | -1.76013200 | -5.01906400 |
| C                                   | -2.68204200 | -1.31968900 | -3.74326900 | C                                      | -2.40532700 | -1.37624700 | -3.85465100 |
| C                                   | -1.95641400 | -1.67050800 | -2.54378900 | C                                      | -1.70208500 | -1.80854600 | -2.68427700 |
| C                                   | -1.92746200 | -0.83669400 | -1.35338600 | C                                      | -1.68206500 | -1.01243500 | -1.48956000 |
| C                                   | -0.69681800 | -1.08351900 | -0.64253700 | C                                      | -0.51256400 | -1.13518000 | -0.67640200 |

|   |             |             |             |   |             |             |             |
|---|-------------|-------------|-------------|---|-------------|-------------|-------------|
| C | -0.68899500 | 1.24680800  | 0.11368300  | C | -0.75223700 | 1.17634800  | 0.13124700  |
| C | -1.93062500 | 1.48501500  | -0.57552700 | C | -1.94981900 | 1.32202100  | -0.64783700 |
| C | -2.54091500 | 0.45355800  | -1.35641400 | C | -2.42446400 | 0.25662300  | -1.47474300 |
| C | -3.24725600 | 0.82571200  | -2.56720100 | C | -3.14008200 | 0.65016100  | -2.65579100 |
| C | -3.41197400 | -0.04634100 | -3.73188200 | C | -3.11960700 | -0.15467500 | -3.84043900 |
| C | -3.38591000 | 0.84093300  | -4.91811300 | C | -3.10331000 | 0.69881900  | -4.99047800 |
| C | -2.66081100 | 0.47778100  | -6.12987600 | C | -2.34988000 | 0.35457100  | -6.16352300 |
| C | -2.00521700 | 1.52581200  | -6.87316700 | C | -1.84944800 | 1.45313800  | -6.92950500 |
| C | -0.77611700 | 1.30626200  | -7.60021500 | C | -0.62750200 | 1.33942600  | -7.67545600 |
| C | -0.00892100 | 2.54956800  | -7.59380500 | C | 0.08985100  | 2.59487700  | -7.61592300 |
| C | 1.43613200  | 2.54471000  | -7.58492200 | C | 1.52293700  | 2.63403600  | -7.52303000 |
| C | 2.09265500  | 3.61070800  | -6.88776500 | C | 2.07631900  | 3.74612900  | -6.81195300 |
| C | 3.32049700  | 3.36470500  | -6.17356400 | C | 3.32186100  | 3.62056400  | -6.08084300 |
| C | 3.34667100  | 4.20703300  | -4.98753600 | C | 3.25232600  | 4.40947000  | -4.86000500 |
| C | 4.06786200  | 3.86339900  | -3.78324600 | C | 3.85810600  | 3.95390800  | -3.64304700 |
| C | 3.48549600  | 4.30522900  | -2.51064800 | C | 3.21346400  | 4.35851000  | -2.42804200 |
| C | 3.47453900  | 3.39990600  | -1.33800400 | C | 3.24459900  | 3.51934700  | -1.23962600 |
| C | 2.18129300  | 3.53682900  | -0.68569600 | C | 1.97631000  | 3.61527300  | -0.54392100 |
| C | 1.52026300  | 2.47042600  | 0.03725100  | C | 1.40113600  | 2.47461900  | 0.10158500  |
| C | 0.07744000  | 2.48159100  | 0.08930000  | C | -0.03411300 | 2.43265200  | 0.14689300  |
| C | -0.68430200 | 3.47218400  | -0.59857000 | C | -0.83318100 | 3.38416400  | -0.57179700 |
| C | -1.92979800 | 2.86331100  | -1.02064900 | C | -2.02670000 | 2.71106500  | -1.07338300 |
| C | -2.51661200 | 3.22985600  | -2.25716900 | C | -2.69053000 | 3.12095700  | -2.27694300 |
| C | -3.18519800 | 2.19587700  | -3.00920400 | C | -3.23553000 | 2.04529600  | -3.06936000 |
| C | -3.24085400 | 2.20882200  | -4.44447900 | C | -3.21222300 | 2.07543900  | -4.52208700 |
| C | -2.56485600 | 3.25602500  | -5.18198100 | C | -2.64194200 | 3.18235100  | -5.25071300 |
| C | -1.98540900 | 2.90188200  | -6.42063400 | C | -1.94083200 | 2.82327200  | -6.44926800 |
| C | -0.74934900 | 3.52626800  | -6.87968400 | C | -0.73249700 | 3.51588600  | -6.88379300 |

|   |             |             |             |   |             |             |             |
|---|-------------|-------------|-------------|---|-------------|-------------|-------------|
| C | -0.08901700 | 4.54406800  | -6.09607400 | C | -0.16510800 | 4.54392100  | -6.06989700 |
| C | 1.34039400  | 4.59813400  | -6.15697900 | C | 1.25317600  | 4.66395800  | -6.07553400 |
| C | 2.10465300  | 4.96213000  | -4.98899600 | C | 1.98429400  | 5.06710100  | -4.86807400 |
| C | 1.46629900  | 5.31142500  | -3.75940600 | C | 1.28807700  | 5.33849900  | -3.65505700 |
| C | 2.16836000  | 4.94342900  | -2.54523600 | C | 1.94542900  | 5.01613500  | -2.43295000 |
| C | 1.39983100  | 4.50040500  | -1.40964200 | C | 1.17650800  | 4.56382300  | -1.26718300 |
| C | -0.04243500 | 4.48018600  | -1.40328000 | C | -0.24090900 | 4.44522100  | -1.32326400 |
| C | -0.70831600 | 4.94995000  | -2.56266000 | C | -0.93366300 | 4.87353400  | -2.53182700 |
| C | -1.93493800 | 4.31651000  | -3.00299500 | C | -2.19972700 | 4.31227400  | -2.99097100 |
| C | -1.94314100 | 4.32013500  | -4.42960300 | C | -2.17530600 | 4.34232000  | -4.47223000 |
| C | -0.72710200 | 4.96570000  | -4.89491000 | C | -0.89592300 | 4.92140300  | -4.86691100 |
| C | 0.03671200  | 5.35334600  | -3.73728200 | C | -0.15748600 | 5.26759700  | -3.67959900 |
| C | 2.14430300  | -0.98912400 | -0.66741500 | C | 3.83918800  | 0.01083300  | -1.31993300 |
| C | 3.38282400  | -0.36371000 | -1.12425100 | C | 4.59874700  | 0.47912800  | -2.48560100 |
| C | 3.96503800  | -0.72232000 | -2.36442300 | C | 4.54543800  | -0.23075500 | -3.71970600 |
| C | 4.64479600  | 0.30697200  | -3.10134300 | C | 4.63809300  | 0.53009700  | -4.92069100 |
| C | 4.61829800  | 0.31981300  | -4.53809200 | C | 3.91619300  | 0.11132700  | -6.12832400 |
| C | 3.92673100  | -0.69820500 | -5.28210300 | C | 3.11650700  | -1.06634200 | -6.13490800 |
| C | 3.32618400  | -0.33147300 | -6.51247600 | C | 1.93376100  | -1.04236800 | -6.93632800 |
| C | 2.07727100  | -0.94200900 | -6.93324600 | C | 0.74194300  | -1.76328900 | -6.50200400 |
| C | 1.43129600  | -1.96354800 | -6.13887300 | C | 0.72337000  | -2.57203800 | -5.31761900 |
| C | -0.00590300 | -2.00505700 | -6.15244700 | C | -0.51346100 | -2.53701600 | -4.57558900 |
| C | -0.75212200 | -2.40287500 | -4.98851200 | C | -0.53663900 | -2.56649700 | -3.12307000 |
| C | -0.06883600 | -2.77654600 | -3.77896300 | C | 0.67581600  | -2.63140700 | -2.34453700 |
| C | -0.71194000 | -2.42381600 | -2.55216400 | C | 0.65594500  | -1.87571500 | -1.12585100 |
| C | 0.05344800  | -2.06411800 | -1.38447100 | C | 1.83279900  | -1.17442300 | -0.62421100 |
| C | 1.48411200  | -2.01235400 | -1.44590000 | C | 3.04014300  | -1.16515200 | -1.38825000 |
| C | 2.12260200  | -2.43611200 | -2.64470200 | C | 3.06177900  | -1.95745100 | -2.61134400 |

|    |             |             |             |    |             |             |             |
|----|-------------|-------------|-------------|----|-------------|-------------|-------------|
| C  | 3.34261600  | -1.79048200 | -3.11257300 | C  | 3.77525800  | -1.45575700 | -3.75791400 |
| C  | 3.32838800  | -1.78172600 | -4.53418200 | C  | 3.10049700  | -1.91064200 | -4.94687100 |
| C  | 2.10006700  | -2.41902900 | -4.97475900 | C  | 1.97139900  | -2.74793300 | -4.55496600 |
| C  | 1.36063600  | -2.82701400 | -3.79899700 | C  | 1.94701600  | -2.77668300 | -3.07377700 |
| Lu | 2.25373200  | 2.37955600  | -3.16161100 | Lu | -0.72597600 | 2.61689000  | -3.74068100 |
| Lu | -1.13316500 | 0.51253300  | -4.09952500 | Lu | 1.19340600  | -0.64712500 | -3.78985600 |
| O  | 0.62610200  | 1.35953600  | -3.69597800 | O  | 0.76906200  | 1.29971000  | -3.75071000 |

| <b>Lu<sub>2</sub>O@C<sub>1</sub>(31876)-C<sub>80</sub></b> |             |             |             | <b>Lu<sub>2</sub>O@C<sub>2v</sub>(5)-C<sub>80</sub></b> |             |            |             |
|------------------------------------------------------------|-------------|-------------|-------------|---------------------------------------------------------|-------------|------------|-------------|
| C                                                          | 12.75074800 | 9.23706500  | 13.83271500 | C                                                       | 16.56554100 | 7.58461400 | -0.21818300 |
| C                                                          | 12.17940700 | 7.97204700  | 13.45741500 | C                                                       | 15.22292100 | 7.47033100 | 0.29475600  |
| C                                                          | 12.29174100 | 7.81831400  | 12.01905300 | C                                                       | 17.48257800 | 6.49491400 | -0.13714200 |
| C                                                          | 12.95793600 | 8.98493900  | 11.48460200 | C                                                       | 18.87538300 | 6.82479800 | 0.09507500  |
| C                                                          | 13.16777200 | 9.90987400  | 12.59910200 | C                                                       | 19.65132700 | 5.99300900 | 0.97849800  |
| C                                                          | 14.24878100 | 10.86066500 | 12.60194200 | C                                                       | 19.13923700 | 4.78284400 | 1.57373000  |
| C                                                          | 14.80530800 | 11.20756600 | 13.86974100 | C                                                       | 17.84247500 | 4.37381000 | 1.14450600  |
| C                                                          | 14.46933900 | 10.44871600 | 15.06565500 | C                                                       | 16.99826800 | 5.25625400 | 0.35306400  |
| C                                                          | 13.57166800 | 9.33625700  | 15.01841800 | C                                                       | 15.63318000 | 5.12765600 | 0.83358000  |
| C                                                          | 13.90458400 | 8.11604400  | 15.78955500 | C                                                       | 15.62098200 | 4.09781100 | 1.83960000  |
| C                                                          | 13.47920300 | 6.80792900  | 15.26523200 | C                                                       | 19.63446200 | 4.40948800 | 2.89803800  |
| C                                                          | 12.62878900 | 6.75989600  | 14.09606600 | C                                                       | 17.44058800 | 3.24572700 | 3.28261700  |
| C                                                          | 12.93731600 | 5.80957200  | 13.03077400 | C                                                       | 16.55802600 | 3.35474400 | 4.43182600  |
| C                                                          | 12.80374000 | 6.50036100  | 11.74699300 | C                                                       | 15.25031700 | 3.82827000 | 4.26532100  |
| C                                                          | 13.80895500 | 6.30060000  | 10.72300300 | C                                                       | 14.76493100 | 4.19876300 | 2.94972700  |
| C                                                          | 14.39092200 | 7.48501300  | 10.04222100 | C                                                       | 16.97957500 | 3.61985300 | 2.01575000  |
| C                                                          | 13.99230000 | 8.84600500  | 10.47603600 | C                                                       | 13.89921800 | 5.33871600 | 3.09102100  |
| C                                                          | 14.96401200 | 9.90578600  | 10.40309000 | C                                                       | 18.77707100 | 3.59640300 | 3.69972100  |
| C                                                          | 15.08777700 | 10.91724700 | 11.44321300 | C                                                       | 20.68091000 | 5.23995600 | 5.00116900  |
| C                                                          | 16.47681300 | 11.28011100 | 11.56191100 | C                                                       | 21.09086600 | 6.38230500 | 5.78030500  |

|   |             |             |             |   |             |             |            |
|---|-------------|-------------|-------------|---|-------------|-------------|------------|
| C | 17.03935400 | 11.58974000 | 12.83378900 | C | 21.54897500 | 7.54017700  | 5.13877100 |
| C | 16.18046700 | 11.61354000 | 13.98255800 | C | 21.14185700 | 6.47727300  | 2.91579000 |
| C | 16.66441700 | 11.18825500 | 15.26888200 | C | 20.63212000 | 5.26581200  | 3.57413200 |
| C | 15.61173300 | 10.44634400 | 15.91896500 | C | 21.59183700 | 7.57832600  | 3.70318000 |
| C | 15.89047300 | 9.35744200  | 16.79367300 | C | 20.66246900 | 6.80816600  | 1.58914000 |
| C | 15.01949300 | 8.17568600  | 16.73612000 | C | 13.81184900 | 5.65736600  | 4.51087600 |
| C | 15.53993100 | 6.94787600  | 17.23340600 | C | 19.64888700 | 4.57156400  | 5.76595400 |
| C | 15.17153400 | 5.67765500  | 16.64133500 | C | 14.84579500 | 8.76613300  | 0.78780900 |
| C | 14.24558700 | 5.59443300  | 15.57591800 | C | 13.51453200 | 7.67908300  | 2.56808500 |
| C | 14.44168800 | 4.54689500  | 14.55477300 | C | 13.87914800 | 6.36974000  | 2.10134400 |
| C | 13.86501000 | 4.73660000  | 13.22009400 | C | 18.72302600 | 3.77647800  | 5.13402900 |
| C | 14.56617000 | 4.29914000  | 12.06063900 | C | 17.34090700 | 3.78055600  | 5.56578400 |
| C | 14.58992200 | 5.10800800  | 10.84661400 | C | 19.25015400 | 5.41366000  | 6.87249000 |
| C | 15.92011400 | 5.02506500  | 10.30821500 | C | 17.86825900 | 5.60786500  | 7.17549700 |
| C | 16.45871100 | 6.11658000  | 9.62561800  | C | 16.86924000 | 4.75430400  | 6.49787600 |
| C | 15.68866400 | 7.32941700  | 9.45837300  | C | 14.70854900 | 4.74889800  | 5.22617000 |
| C | 16.64006100 | 8.41387000  | 9.40356600  | C | 19.81620000 | 7.75553400  | 7.38499600 |
| C | 16.28030400 | 9.68111300  | 9.87926800  | C | 18.44772500 | 7.97244000  | 7.77536900 |
| C | 17.22995300 | 10.49221600 | 10.59887200 | C | 17.47964200 | 6.93207600  | 7.65919000 |
| C | 18.54536400 | 10.00532800 | 10.86427100 | C | 20.20768500 | 6.49217400  | 6.92898500 |
| C | 19.20850400 | 10.49598000 | 12.06382900 | C | 16.11693600 | 7.35523100  | 7.44615000 |
| C | 18.41572300 | 11.21565600 | 13.04860300 | C | 15.94605700 | 9.67023800  | 0.63962700 |
| C | 18.91727500 | 10.87726400 | 14.34725200 | C | 16.21448800 | 10.67626500 | 1.61694800 |
| C | 18.02974500 | 10.83195300 | 15.48276700 | C | 13.33063300 | 7.98566700  | 3.98068700 |
| C | 18.31797500 | 9.89621800  | 16.50467100 | C | 15.48579400 | 5.22073700  | 6.32540200 |
| C | 17.25422500 | 9.21187900  | 17.20792600 | C | 13.49712400 | 6.96672100  | 4.99702700 |
| C | 17.76375800 | 7.93735300  | 17.63334400 | C | 17.59149600 | 11.06218600 | 1.75727200 |
| C | 16.90346000 | 6.83242700  | 17.70257500 | C | 18.09390700 | 11.53086600 | 3.01254500 |

|   |             |            |             |   |             |             |             |
|---|-------------|------------|-------------|---|-------------|-------------|-------------|
| C | 17.40011400 | 5.51723200 | 17.35300700 | C | 17.23566600 | 11.66392100 | 4.12830000  |
| C | 16.30773400 | 4.78568900 | 16.74720800 | C | 15.85760900 | 11.29359200 | 4.01214600  |
| C | 16.55120900 | 3.87282100 | 15.71957800 | C | 15.32661600 | 10.79219500 | 2.78504000  |
| C | 15.60131300 | 3.72787800 | 14.64869800 | C | 19.24372600 | 9.93315700  | 6.74188500  |
| C | 16.36051500 | 3.39792100 | 13.45625400 | C | 20.98054500 | 9.71681200  | 4.48707700  |
| C | 15.86705800 | 3.70058000 | 12.19868400 | C | 19.94887100 | 10.70594800 | 4.47632400  |
| C | 16.74591300 | 4.22805400 | 11.18414900 | C | 19.05295600 | 10.82548700 | 5.64191600  |
| C | 18.08548500 | 4.60646800 | 11.49507600 | C | 17.71542400 | 11.31389500 | 5.43654100  |
| C | 18.63683900 | 5.74634800 | 10.75304700 | C | 19.44283900 | 11.06909100 | 3.18114600  |
| C | 17.84304800 | 6.45131300 | 9.80488900  | C | 14.22456500 | 9.87825400  | 2.90615500  |
| C | 17.96273300 | 7.90056300 | 9.64198500  | C | 14.00656700 | 8.86293900  | 1.92165700  |
| C | 18.91308000 | 8.66482700 | 10.37997200 | C | 14.76878400 | 6.26174100  | 0.92966500  |
| C | 19.89904600 | 7.92208800 | 11.14274600 | C | 15.11520400 | 6.52188600  | 6.84424500  |
| C | 20.62991900 | 8.46023600 | 12.27935700 | C | 14.06437000 | 7.37582500  | 6.28595300  |
| C | 20.27699300 | 9.78868600 | 12.75882300 | C | 15.74402800 | 8.73055300  | 7.23633900  |
| C | 20.04844600 | 9.97255900 | 14.18984900 | C | 14.47693400 | 8.77938600  | 6.51645400  |
| C | 20.21715400 | 8.90221500 | 15.16883500 | C | 20.56179500 | 8.16665500  | 1.05119300  |
| C | 19.43666100 | 8.97167800 | 16.37056700 | C | 19.41144300 | 8.18058700  | 0.11830900  |
| C | 19.11173100 | 7.78605400 | 17.12280400 | C | 16.78652400 | 9.73345200  | 7.13469400  |
| C | 19.55875300 | 6.52386000 | 16.69382800 | C | 18.11502700 | 9.35071500  | 7.44739600  |
| C | 18.70800000 | 5.36457500 | 16.85256500 | C | 14.37386300 | 9.78016400  | 5.43773400  |
| C | 18.93372500 | 4.50206300 | 15.70300800 | C | 13.76611900 | 9.36063900  | 4.19618300  |
| C | 17.89203300 | 3.74089500 | 15.16879200 | C | 15.43721100 | 10.74111700 | 5.29868700  |
| C | 17.76681100 | 3.56492600 | 13.73876400 | C | 16.59994400 | 10.76378600 | 6.16575600  |
| C | 18.61903300 | 4.25931600 | 12.82275900 | C | 20.76958000 | 9.26777800  | 1.99730300  |
| C | 19.70388300 | 5.05861600 | 13.40417300 | C | 21.30069100 | 8.95113800  | 3.28865700  |
| C | 20.21748100 | 6.16469700 | 12.64416900 | C | 17.03337700 | 8.94232900  | -0.01247200 |
| C | 19.69717700 | 6.49593400 | 11.36014200 | C | 18.42385500 | 9.27569500  | 0.15855000  |

|    |             |            |             |    |             |             |            |
|----|-------------|------------|-------------|----|-------------|-------------|------------|
| C  | 20.75916500 | 7.37781300 | 13.24432300 | C  | 21.15907100 | 8.85100100  | 5.62169100 |
| C  | 20.61560100 | 7.56609400 | 14.67883000 | C  | 20.30082900 | 8.95598100  | 6.72976500 |
| C  | 20.27236200 | 6.40826500 | 15.44457900 | C  | 19.83140800 | 10.37143900 | 1.96219300 |
| C  | 19.86398000 | 5.15205600 | 14.81390000 | C  | 18.68056900 | 10.37047200 | 1.06589600 |
| Lu | 14.56081500 | 7.79965700 | 12.95321800 | Lu | 15.79323300 | 7.87619800  | 4.76012000 |
| Lu | 18.43506900 | 8.35602500 | 13.19613600 | Lu | 18.58899000 | 8.14130900  | 2.34438600 |
| O  | 16.54347700 | 7.71319400 | 13.23096200 | O  | 17.49784300 | 7.43617200  | 3.84443500 |

### References

- S1. Tang, Q.; Abella, L.; Hao, Y.; Li, X.; Wan, Y.; Rodríguez-Forteza, A.; Poblet, J. M.; Feng, L.; Chen, N., Sc<sub>2</sub>O@C<sub>2v</sub>(5)-C<sub>80</sub>: Dimetallic Oxide Cluster Inside a C<sub>80</sub> Fullerene Cage. *Inorg. Chem.* **2015**, *54* (20), 9845-9852.
- S2. Fowler, P.; Manolopoulos, D., An Atlas of Fullerenes. *Oxford Press, Clarendon* **1995**.
